# Supplementary material for: Investigation of the Molecular Epidemiology and Evolution of Circulating Severe Acute Respiratory Syndrome Coronavirus 2 in Thailand from 2020 to 2022 via Next-Generation Sequencing
Source: MDPI journal article supplement (doi:10.3390/v15061394), 2023-06-19
Supplement: s1 [file s1]

**Supplement Table S1.** GISAID Accession Numbers.

| No | CODE   | Accession       | Collection date |
|----|--------|-----------------|-----------------|
| 1  | CU5394 | EPI_ISL_5880076 | 11-08-21        |
| 2  | CU5385 | EPI_ISL_5879729 | 11-08-21        |
| 3  | CU5614 | EPI_ISL_5880433 | 16-09-21        |
| 4  | CU5095 | EPI_ISL_5879592 | 30-07-21        |
| 5  | CU4793 | EPI_ISL_5879614 | 15-07-21        |
| 6  | CU5615 | EPI_ISL_5880434 | 16-09-21        |
| 7  | CU5616 | EPI_ISL_5880497 | 16-09-21        |
| 8  | CU5169 | EPI_ISL_5879819 | 05-08-21        |
| 9  | CU5378 | EPI_ISL_5879908 | 11-08-21        |
| 10 | CU5381 | EPI_ISL_5879921 | 11-08-21        |
| 11 | CU3307 | EPI_ISL_4255179 | 20-05-21        |
| 12 | CU3313 | EPI_ISL_4255418 | 20-05-21        |
| 13 | CU5182 | EPI_ISL_5879633 | 05-08-21        |
| 14 | CU5244 | EPI_ISL_5879601 | 09-08-21        |
| 15 | CU5608 | EPI_ISL_5880288 | 16-09-21        |
| 16 | CU3312 | EPI_ISL_4255169 | 20-05-21        |
| 17 | CU3486 | EPI_ISL_5879569 | 27-05-21        |
| 18 | CU5174 | EPI_ISL_5879597 | 05-08-21        |
| 19 | CU5243 | EPI_ISL_5879600 | 09-08-21        |
| 20 | CU5377 | EPI_ISL_5879635 | 11-08-21        |
| 21 | CU3585 | EPI_ISL_5879605 | 04-06-21        |
| 22 | CU5091 | EPI_ISL_5879615 | 30-07-21        |
| 23 | CU5179 | EPI_ISL_5879824 | 05-08-21        |
| 24 | CU5171 | EPI_ISL_5879823 | 05-08-21        |
| 25 | CU5380 | EPI_ISL_5879918 | 11-08-21        |
| 26 | CU5175 | EPI_ISL_5879623 | 05-08-21        |
| 27 | CU5384 | EPI_ISL_5879923 | 11-08-21        |
| 28 | CU618  | EPI_ISL_1346630 | 04-01-21        |
| 29 | CU3605 | EPI_ISL_5879609 | 04-06-21        |
| 30 | CU647  | EPI_ISL_1346636 | 22-01-21        |
| 31 | CU1501 | EPI_ISL_4255004 | 23-03-21        |
| 32 | CU3394 | EPI_ISL_5879603 | 22-05-21        |
| 33 | CU617  | EPI_ISL_1346628 | 04-01-21        |
| 34 | CU632  | EPI_ISL_1346631 | 12-01-21        |
| 35 | CU646  | EPI_ISL_1346634 | 27-01-21        |
| 36 | CU1350 | EPI_ISL_4254829 | 09-03-21        |
| 37 | CU1351 | EPI_ISL_4254830 | 09-03-21        |
| 38 | CU1208 | EPI_ISL_4254674 | 17-02-21        |
| 39 | CU1561 | EPI_ISL_4254677 | 3-Jan-21        |

|    |        |                  |          |
|----|--------|------------------|----------|
| 40 | CU1295 | EPI_ISL_4254828  | 03-03-21 |
| 41 | CU1143 | EPI_ISL_4254675  | 16-02-21 |
| 42 | CU1475 | EPI_ISL_4254726  | 23-03-21 |
| 43 | CU1477 | EPI_ISL_4254678  | 23-03-21 |
| 44 | CU1205 | EPI_ISL_4254666  | 17-02-21 |
| 45 | CU5176 | EPI_ISL_5879626  | 05-08-21 |
| 46 | CU5177 | EPI_ISL_5879628  | 05-08-21 |
| 47 | CU492  | EPI_ISL_1346626  | 21-12-20 |
| 48 | CU4024 | EPI_ISL_5879588  | 24-06-21 |
| 49 | CU4028 | EPI_ISL_5879589  | 24-06-21 |
| 50 | CU5093 | EPI_ISL_5879618  | 30-07-21 |
| 51 | CU1131 | EPI_ISL_4255005  | 15-02-21 |
| 52 | CU1398 | EPI_ISL_4255166  | 16-03-21 |
| 53 | CU4008 | EPI_ISL_5879585  | 24-06-21 |
| 54 | CU3324 | EPI_ISL_4255541  | 20-05-21 |
| 55 | CU3687 | EPI_ISL_5879581  | 14-06-21 |
| 56 | CU3494 | EPI_ISL_5879574  | 27-05-21 |
| 57 | CU3682 | EPI_ISL_5879577  | 14-06-21 |
| 58 | CU3062 | EPI_ISL_4255167  | 11-05-21 |
| 59 | CU3116 | EPI_ISL_4255168  | 14-05-21 |
| 60 | CU3118 | EPI_ISL_4255170  | 14-05-21 |
| 61 | CU3135 | EPI_ISL_4255171  | 14-05-21 |
| 62 | CU3365 | EPI_ISL_4255542  | 22-05-21 |
| 63 | CU3379 | EPI_ISL_4255543  | 22-05-21 |
| 64 | CU6392 | EPI_ISL_10189523 | 14-12-21 |
| 65 | CU6397 | EPI_ISL_10189524 | 16-12-21 |
| 66 | CU6418 | EPI_ISL_10189525 | 18-12-21 |
| 67 | CU6994 | EPI_ISL_10189526 | 08-01-22 |
| 68 | CU6997 | EPI_ISL_10189527 | 08-01-22 |
| 69 | CU7036 | EPI_ISL_10189528 | 08-01-22 |
| 70 | CU7112 | EPI_ISL_10189532 | 11-01-22 |
| 71 | CU7113 | EPI_ISL_10189533 | 11-01-22 |
| 72 | CU7138 | EPI_ISL_10189534 | 13-01-22 |
| 73 | CU7141 | EPI_ISL_10189536 | 13-01-22 |
| 74 | CU7146 | EPI_ISL_10189537 | 13-01-22 |
| 75 | CU7174 | EPI_ISL_10189538 | 13-01-22 |
| 76 | CU7176 | EPI_ISL_10189544 | 13-01-22 |
| 77 | CU7188 | EPI_ISL_10238965 | 13-01-22 |
| 78 | CU7194 | EPI_ISL_10239054 | 13-01-22 |
| 79 | CU6743 | EPI_ISL_10239055 | 05-01-22 |
| 80 | CU6822 | EPI_ISL_10239056 | 05-01-22 |
| 81 | CU6861 | EPI_ISL_10239057 | 05-01-22 |

|     |        |                  |          |
|-----|--------|------------------|----------|
| 82  | CU6866 | EPI_ISL_10239119 | 05-01-22 |
| 83  | CU6876 | EPI_ISL_10239120 | 05-01-22 |
| 84  | CU7164 | EPI_ISL_10239121 | 13-01-22 |
| 85  | CU7167 | EPI_ISL_10239155 | 13-01-22 |
| 86  | CU7173 | EPI_ISL_10239190 | 13-01-22 |
| 87  | CU7198 | EPI_ISL_10239191 | 17-01-22 |
| 88  | CU7354 | EPI_ISL_10239276 | 14-01-22 |
| 89  | CU7358 | EPI_ISL_10239321 | 14-01-22 |
| 90  | CU7460 | EPI_ISL_10239378 | 20-01-22 |
| 91  | CU7461 | EPI_ISL_10239438 | 20-01-22 |
| 92  | CU7471 | EPI_ISL_10239439 | 20-01-22 |
| 93  | CU7475 | EPI_ISL_10239440 | 20-01-22 |
| 94  | CU7476 | EPI_ISL_10239505 | 20-01-22 |
| 95  | CU7478 | EPI_ISL_10239506 | 20-01-22 |
| 96  | CU7481 | EPI_ISL_10239655 | 20-01-22 |
| 97  | CU7526 | EPI_ISL_10239656 | 22-01-22 |
| 98  | CU7654 | EPI_ISL_10239724 | 27-01-22 |
| 99  | CU7660 | EPI_ISL_10282024 | 27-01-22 |
| 100 | CU7659 | EPI_ISL_10282086 | 27-01-22 |
| 101 | CU7633 | EPI_ISL_10282087 | 27-01-22 |
| 102 | CU7620 | EPI_ISL_10282088 | 27-01-22 |
| 103 | CU7618 | EPI_ISL_10282089 | 27-01-22 |
| 104 | CU7606 | EPI_ISL_10282090 | 26-01-22 |
| 105 | CU7545 | EPI_ISL_10282171 | 22-01-22 |
| 106 | CU7655 | EPI_ISL_10282172 | 27-01-22 |
| 107 | CU7651 | EPI_ISL_10282665 | 27-01-22 |
| 108 | CU7637 | EPI_ISL_10282666 | 27-01-22 |
| 109 | CU7547 | EPI_ISL_10282744 | 22-01-22 |
| 110 | CU7503 | EPI_ISL_10282745 | 21-01-22 |
| 111 | VOY15  | EPI_ISL_11698090 | 17-01-22 |
| 112 | VOY17  | EPI_ISL_11698091 | 17-01-22 |
| 113 | VOY20  | EPI_ISL_11698092 | 17-01-22 |
| 114 | CU7271 | EPI_ISL_11698093 | 17-01-22 |
| 115 | CU7546 | EPI_ISL_11698094 | 22-01-22 |
| 116 | CU7565 | EPI_ISL_11698095 | 22-01-22 |
| 117 | CU7687 | EPI_ISL_11698096 | 31-01-22 |
| 118 | CU7700 | EPI_ISL_11698097 | 31-01-22 |
| 119 | CU7951 | EPI_ISL_11698098 | 10-02-22 |
| 120 | CU7952 | EPI_ISL_11698099 | 10-02-22 |
| 121 | CU7957 | EPI_ISL_11698100 | 10-02-22 |
| 122 | CU8053 | EPI_ISL_11698101 | 14-02-22 |
| 123 | CU8074 | EPI_ISL_11698102 | 14-02-22 |

|     |        |                  |          |
|-----|--------|------------------|----------|
| 124 | CU8140 | EPI_ISL_11698103 | 21-02-22 |
| 125 | CU8157 | EPI_ISL_11698104 | 22-02-22 |
| 126 | VOY13  | EPI_ISL_11698105 | 14-01-22 |
| 127 | CU8229 | EPI_ISL_11698106 | 24-02-22 |
| 128 | CU8245 | EPI_ISL_11698107 | 24-02-22 |
| 129 | CU8247 | EPI_ISL_11698108 | 24-02-22 |
| 130 | CU8265 | EPI_ISL_11698109 | 24-02-22 |
| 131 | CU8290 | EPI_ISL_11698110 | 24-02-22 |
| 132 | CU8326 | EPI_ISL_11698112 | 26-02-22 |
| 133 | CU8356 | EPI_ISL_11698114 | 28-02-22 |
| 134 | CU8364 | EPI_ISL_11711750 | 28-02-22 |
| 135 | CU8368 | EPI_ISL_11711931 | 01-03-22 |
| 136 | CU8374 | EPI_ISL_11712097 | 01-03-22 |
| 137 | CU8387 | EPI_ISL_11713775 | 01-03-22 |
| 138 | CU8390 | EPI_ISL_11714002 | 02-03-22 |
| 139 | CU8394 | EPI_ISL_11714167 | 02-03-22 |
| 140 | CU8406 | EPI_ISL_11714580 | 02-03-22 |
| 141 | CU8490 | EPI_ISL_12176266 | 07-03-22 |
| 142 | CU8492 | EPI_ISL_12176267 | 07-03-22 |
| 143 | CU8495 | EPI_ISL_12176268 | 07-03-22 |
| 144 | CU8500 | EPI_ISL_12176269 | 07-03-22 |
| 145 | CU8503 | EPI_ISL_12176324 | 07-03-22 |
| 146 | CU8524 | EPI_ISL_12387073 | 07-03-22 |
| 147 | CU8525 | EPI_ISL_12394871 | 07-03-22 |
| 148 | CU8530 | EPI_ISL_12394872 | 07-03-22 |
| 149 | CU8536 | EPI_ISL_17770459 | 08-03-22 |
| 150 | CU8546 | EPI_ISL_17770460 | 08-03-22 |
| 151 | CU8762 | EPI_ISL_12394973 | 17-03-22 |
| 152 | CU8763 | EPI_ISL_12394981 | 17-03-22 |
| 153 | CU8764 | EPI_ISL_17770461 | 17-03-22 |
| 154 | CU8765 | EPI_ISL_12394983 | 17-03-22 |
| 155 | CU8766 | EPI_ISL_12394996 | 17-03-22 |
| 156 | CU8767 | EPI_ISL_12395008 | 17-03-22 |
| 157 | CU8768 | EPI_ISL_12395018 | 17-03-22 |
| 158 | CU8769 | EPI_ISL_12395049 | 17-03-22 |
| 159 | CU8770 | EPI_ISL_17770462 | 17-03-22 |
| 160 | CU8771 | EPI_ISL_17770463 | 17-03-22 |
| 161 | CU8828 | EPI_ISL_17770465 | 21-03-22 |
| 162 | CU8907 | EPI_ISL_17770466 | 24-03-22 |
| 163 | CU8936 | EPI_ISL_17770467 | 25-03-22 |
| 164 | CU8941 | EPI_ISL_17770468 | 25-03-22 |
| 165 | CU8986 | EPI_ISL_17776299 | 04-04-22 |

|     |        |                  |          |
|-----|--------|------------------|----------|
| 166 | CU9023 | EPI_ISL_17776603 | 04-04-22 |
| 167 | CU9027 | EPI_ISL_17776604 | 04-04-22 |
| 168 | CU9034 | EPI_ISL_17776605 | 04-04-22 |
| 169 | CU9045 | EPI_ISL_17778770 | 04-04-22 |
| 170 | CU9058 | EPI_ISL_17778771 | 04-04-22 |
| 171 | CU9059 | EPI_ISL_17779272 | 04-04-22 |
| 172 | CU9049 | EPI_ISL_17779273 | 04-04-22 |
| 173 | CU9263 | EPI_ISL_17779913 | 26-04-22 |
| 174 | CU9331 | EPI_ISL_17779914 | 11-05-22 |
| 175 | CU9354 | EPI_ISL_17779915 | 11-05-22 |
| 176 | CU9355 | EPI_ISL_17779916 | 11-05-22 |
| 177 | CU9357 | EPI_ISL_17779940 | 11-05-22 |
| 178 | CU9360 | EPI_ISL_17779941 | 11-05-22 |
| 179 | CU9363 | EPI_ISL_17779942 | 11-05-22 |
| 180 | CU9366 | EPI_ISL_17779943 | 11-05-22 |
| 181 | CU9371 | EPI_ISL_17779944 | 11-05-22 |
| 182 | CU9394 | EPI_ISL_17779948 | 11-05-22 |
| 183 | CU9401 | EPI_ISL_17779949 | 11-05-22 |
| 184 | CU9408 | EPI_ISL_17779950 | 11-05-22 |
| 185 | CU9413 | EPI_ISL_17779951 | 11-05-22 |
| 186 | CU9436 | EPI_ISL_17779952 | 11-05-22 |
| 187 | CU9437 | EPI_ISL_17779953 | 11-05-22 |
| 188 | CU9662 | EPI_ISL_17779954 | 17-06-22 |
| 189 | CU9679 | EPI_ISL_17779955 | 17-06-22 |
| 190 | CU9684 | EPI_ISL_17779956 | 17-06-22 |
| 191 | CU9689 | EPI_ISL_17779957 | 17-06-22 |
| 192 | CU9693 | EPI_ISL_17779958 | 17-06-22 |
| 193 | CU9700 | EPI_ISL_17779959 | 17-06-22 |
| 194 | CU9709 | EPI_ISL_17779960 | 17-06-22 |
| 195 | CU9713 | EPI_ISL_17779961 | 20-06-22 |
| 196 | CU9714 | EPI_ISL_17779962 | 20-06-22 |
| 197 | CU9722 | EPI_ISL_17779963 | 20-06-22 |
| 198 | CU9723 | EPI_ISL_17779964 | 20-06-22 |
| 199 | CU9726 | EPI_ISL_17779965 | 20-06-22 |
| 200 | CU9728 | EPI_ISL_17779966 | 20-06-22 |
| 201 | CU9730 | EPI_ISL_17779967 | 20-06-22 |
| 202 | CU9737 | EPI_ISL_17779968 | 20-06-22 |
| 203 | CU9778 | EPI_ISL_17779969 | 27-06-22 |
| 204 | CU9779 | EPI_ISL_17779970 | 27-06-22 |
| 205 | CU9816 | EPI_ISL_17779971 | 04-07-22 |
| 206 | CU9819 | EPI_ISL_17779972 | 04-07-22 |
| 207 | CU9822 | EPI_ISL_17779973 | 04-07-22 |

|     |        |                  |          |
|-----|--------|------------------|----------|
| 208 | CU9829 | EPI_ISL_17779974 | 05-07-22 |
| 209 | CU9836 | EPI_ISL_17779975 | 06-07-22 |
| 210 | CU9842 | EPI_ISL_17779976 | 06-07-22 |
